# Supplementary material for: Rabbit Antithymocyte Globulin versus Basiliximab in Renal Transplantation
Source: Atypon-hosted journal article supplement (doi:10.1056/nejmoa060068), 2006-11-08
Supplement: nejm_brennan_sa1.pdf [file nejm_brennan_sa1.pdf]

## Supplementary Appendix

This appendix has been provided by the authors to give readers additional information about their work.

Supplement to: Brennan DC, Daller JA, Lake KD, et al. Rabbit antithymocyte globulin versus basiliximab in renal transplantation. *N Engl J Med* 2006;355:1967-77.

### Steroid Taper Used in the Study

| <b>Study Day</b>   | <b>Steroid Dose</b>               |
|--------------------|-----------------------------------|
| Day 1              | Methylprednisolone 250 mg IV q AM |
| Day 2–4            | Methylprednisolone 125 mg IV q AM |
| Day 5–7            | Prednisone 1 mg/kg PO q AM        |
| Week 2             | Prednisone 0.5 mg/kg PO q AM      |
| Week 3             | Prednisone 25 mg PO q AM          |
| Week 4             | Prednisone 20 mg PO q AM          |
| Week 5             | Prednisone 15 mg PO q AM          |
| Week 6–7           | Prednisone 12.5 mg PO q AM        |
| Week 8–9           | Prednisone 10 mg PO q AM          |
| Week 10            | Prednisone 7.5 mg PO q AM         |
| Week 11 – Month 12 | Prednisone 5 mg PO q AM           |

Note: This table indicates how the corticosteroid dose was to be tapered for subjects in the study. Some investigators were uncomfortable with tapering prednisone to 5 mg by 12 weeks and were allowed to taper it to 5 mg by 6 months. Prednisolone may have been employed instead of prednisone in some European centers in some subjects.
